# Supplementary material for: Reference Database for a Novel Binocular Visual Function Perimeter: A Randomized Clinical Trial
Source: PubMed Central journal article supplement (PMC11388689; doi:10.1016/j.xops.2024.100583), 2024-07-20
Supplement: mmc1.pdf [file mmc1.pdf]

# Flow Diagram

**Enrollment**

Assessed for eligibility (n= 376)

Excluded (n= 20)

- ◆ Ocular condition affecting VF (n=6)
- ◆ RE outside range (n=3)
- ◆ Study eye not eligible per committee (n=4)
- ◆ Did not complete all study requirements (n=5)
- ◆ Unable to tolerate ophthalmic imaging (n=1)
- ◆ IOP $\geq$ 22 (n=1)

Randomized (n= 356)

**Allocation**

24-2 VF testing first (n= 178)

10-2 VF testing first (n=178)

**Analysis**

Analysed (n= 178)

- ◆ Excluded from analysis (n=0)

Analysed (n= 178)

- ◆ Excluded from analysis (n=0)
